# Supplementary material for: Functional correlates of clinical phenotype and severity in recurrent SCN2A variants
Source: PubMed Central journal article supplement (PMC9151917; doi:10.1038/s42003-022-03454-1), 2022-05-30
Supplement: 42003_2022_3454_MOESM3_ESM.pdf [file 42003_2022_3454_MOESM3_ESM.pdf]

## Description of Additional Supplementary Files

**File name:** Supplementary Data 1

**Description:** Clinical features of all individuals included in the study.

**File name:** Supplementary Data 2

**Description:** The biophysical characteristics and the predicted functional impact of all recurrent variants included in this study.

**File name:** Supplementary Data 3

**Description:** The source data points for Figures 2b-f, 3b-e, 4b-e, 5c-d, and 5f.
